# Supplementary material
Source: ML conference proceedings conference paper supplement (https://proceedings.mlr.press/v37/narasimhana15.html)
Supplement: Supplementary file 1 [file narasimhana15-supp.pdf]

## A. Proof of Lemma 3

**Lemma 3.** *The stability parameter of a performance measure  $\Psi(\cdot)$  can be written as  $\delta(\epsilon) \leq L_\Psi \cdot \epsilon$  iff its sufficient dual region is bounded in a ball of radius  $\Theta(L_\Psi)$ .*

*Proof.* Let us denote primal variables using the notation  $\mathbf{x} = (u, v)$  and dual variables using the notation  $\boldsymbol{\theta} = (\alpha, \beta)$ . The proof follows from the fact that any value of  $\boldsymbol{\theta}$  for which  $\Psi^*(\boldsymbol{\theta}) = -\infty$  can be safely excluded from the sufficient dual region.

For proving the result in one direction suppose  $\Psi$  is stable with  $\delta(\epsilon) = L\epsilon$  for some  $L > 0$ . Now consider some  $\boldsymbol{\theta} \in \mathbb{R}^2$  such that  $\|\boldsymbol{\theta}\|_2 \geq L$ . Now set  $\mathbf{x}_C = -C \cdot \boldsymbol{\theta}$ . Then we have

$$\begin{aligned}
 \Psi^*(\boldsymbol{\theta}) &= \inf_{\mathbf{x}} \{ \langle \boldsymbol{\theta}, \mathbf{x} \rangle - \Psi(\mathbf{x}) \} \\
 &\leq \inf_{C>0} \{ \langle \boldsymbol{\theta}, \mathbf{x}_C \rangle - \Psi(\mathbf{x}_C) \} \\
 &= \inf_{C>0} \{ -C \|\boldsymbol{\theta}\|_2^2 - \Psi(\mathbf{x}_C) \} \\
 &\leq \inf_{C>0} \{ -C \|\boldsymbol{\theta}\|_2^2 - \Psi(\mathbf{0}) + CL \|\boldsymbol{\theta}\|_\infty \} \\
 &\leq \inf_{C>0} \{ -C \|\boldsymbol{\theta}\|_2^2 - \Psi(\mathbf{0}) + CL \|\boldsymbol{\theta}\|_2 \} \\
 &= \inf_{C>0} \{ -C \|\boldsymbol{\theta}\|_2 (\|\boldsymbol{\theta}\|_2 - L) \} - \Psi(\mathbf{0}) \\
 &\leq \inf_{C>0} \{ -C \|\boldsymbol{\theta}\|_2 - \Psi(\mathbf{0}) \} \\
 &= -\infty
 \end{aligned}$$

Thus, we can conclude that no dual vector with norm greater than  $L$  can be a part of the sufficient dual region. This shows that the sufficient dual region is bounded inside a ball of radius  $L$ . For proving the result in the other direction, suppose the dual sufficient region is indeed bounded in a ball of radius  $R$ . Consider two points  $\mathbf{x}_1, \mathbf{x}_2$  such that

$$\begin{aligned}
 \boldsymbol{\theta}_1^* &= \arg \min_{\boldsymbol{\theta} \in \mathcal{A}_\Psi} \{ \langle \boldsymbol{\theta}, \mathbf{x}_1 \rangle - \Psi^*(\boldsymbol{\theta}) \} \\
 \boldsymbol{\theta}_2^* &= \arg \min_{\boldsymbol{\theta} \in \mathcal{A}_\Psi} \{ \langle \boldsymbol{\theta}, \mathbf{x}_2 \rangle - \Psi^*(\boldsymbol{\theta}) \}
 \end{aligned}$$

Now define  $f(\boldsymbol{\theta}, \mathbf{x}) := \langle \boldsymbol{\theta}, \mathbf{x} \rangle - \Psi^*(\boldsymbol{\theta})$  so that, by the above definition,  $f(\boldsymbol{\theta}_1^*, \mathbf{x}_1) = \Psi(\mathbf{x}_1)$  and  $f(\boldsymbol{\theta}_2^*, \mathbf{x}_2) = \Psi(\mathbf{x}_2)$ . Now we have

$$\begin{aligned}
 \Psi(\mathbf{x}_1) &= f(\boldsymbol{\theta}_1^*, \mathbf{x}_1) \leq f(\boldsymbol{\theta}_2^*, \mathbf{x}_1) \\
 &\leq f(\boldsymbol{\theta}_2^*, \mathbf{x}_2) + |\langle \boldsymbol{\theta}_2^*, \mathbf{x}_1 - \mathbf{x}_2 \rangle| \\
 &= \Psi(\mathbf{x}_2) + |\langle \boldsymbol{\theta}_2^*, \mathbf{x}_1 - \mathbf{x}_2 \rangle| \\
 &\leq \Psi(\mathbf{x}_2) + R \|\mathbf{x}_1 - \mathbf{x}_2\|_2,
 \end{aligned}$$

where the fourth step follows from the norm bound on  $\boldsymbol{\theta}_2^*$ . Similarly we have

$$\Psi(\mathbf{x}_2) \leq \Psi(\mathbf{x}_1) + R \|\mathbf{x}_1 - \mathbf{x}_2\|_2$$

This establishes the result. □

## B. Proof of Theorem 4

**Theorem 4.** *Suppose we are given a stream of random samples  $(\mathbf{x}_1, y_1), \dots, (\mathbf{x}_T, y_T)$  drawn from a distribution  $\mathcal{D}$  over  $\mathcal{X} \times \mathcal{Y}$ . Let  $\Psi(\cdot)$  be a concave, Lipschitz link function. Let Algorithm 1 be executed with a dual feasible set  $\mathcal{A} \supseteq \mathcal{A}_\Psi$ ,*

$\eta_t = 1/\sqrt{t}$  and  $\eta'_t = 1/\sqrt{t}$ . Then, the average model  $\bar{\mathbf{w}} = \frac{1}{T} \sum_{t=1}^T \mathbf{w}_t$  output by the algorithm satisfies, with probability at least  $1 - \delta$ ,

$$\mathcal{P}_\Psi(\bar{\mathbf{w}}) \geq \sup_{\mathbf{w}^* \in \mathcal{W}} \mathcal{P}_\Psi(\mathbf{w}^*) - \delta_\Psi \left( \sqrt{\frac{2B_r^2}{T} \log \frac{1}{\delta}} \right) - (L_\Psi^2 + 4B_r^2) \frac{1}{2\sqrt{T}} - (L_\Psi^2 L_r^2 + R_W^2) \frac{1}{2\sqrt{T}} - \sqrt{\frac{2L_\Psi^2 B_r^2}{T} \log \frac{1}{\delta}}.$$

*Proof.* For this proof we shall assume that  $\Psi$  is  $L_\Psi$ -Lipschitz so that its sufficient dual region can be bounded by an application of Lemma 3. Notice that the updates for  $(\alpha, \beta)$  can be written as follows:

$$(\alpha_{t+1}, \beta_{t+1}) \leftarrow \Pi_{\mathcal{A}_\Psi} \left( (\alpha_t, \beta_t) - \eta_t \nabla_{(\alpha, \beta)} \ell_t^d(\alpha_t, \beta_t) \right),$$

where

$$\ell_t^d(\alpha, \beta) = \begin{cases} \alpha r^+(\mathbf{w}_t; \mathbf{x}_t, y_t) - \Psi^*(\alpha, \beta) & \text{if } y_t > 0 \\ \beta r^-(\mathbf{w}_t; \mathbf{x}_t, y_t) - \Psi^*(\alpha, \beta) & \text{if } y_t < 0 \end{cases}$$

which can be interpreted as simple gradient descent with  $\ell_t$ . Moreover, since  $\Psi^*$  is concave,  $\ell_t^d$  is convex with respect to  $(\alpha, \beta)$  for every  $t$ . Note that the terms  $r^+(\mathbf{w}_t; \mathbf{x}_t, y_t)$  and  $r^-(\mathbf{w}_t; \mathbf{x}_t, y_t)$  do not involve  $\alpha, \beta$  and hence act as arbitrary bounded positive constants for this part of the analysis.

Note that by Lemma 3, we have the radius of  $\mathcal{A}_\Psi$  bounded by  $L_\Psi$ . Also, since  $\Psi$  is a monotone function, by a similar argument,  $\Psi^*(\alpha, \beta)$  can be shown to be a  $\Psi(B_r, B_r)$ -Lipschitz function. For all the performance measures considered, we have  $\Psi(B_r, B_r) \leq B_r$ . Thus,  $\ell_t^d(\alpha, \beta)$  is a  $2B_r$ -Lipschitz function. Hence, using a standard GIGA-style analysis (Zinkevich, 2003) on the (descent) updates on  $\alpha_t$  and  $\beta_t$  in Algorithm 1, we have (for  $\eta_t = \frac{1}{\sqrt{t}}$ )

$$\begin{aligned} & \frac{1}{T} \sum_{t=1}^T [\alpha_t r^+(\mathbf{w}_t; \mathbf{x}_t, y_t) + \beta_t r^-(\mathbf{w}_t; \mathbf{x}_t, y_t) - \Psi^*(\alpha_t, \beta_t)] \\ & \leq \inf_{(\alpha, \beta) \in \mathcal{A}} \left\{ \frac{1}{T} \sum_{t=1}^T [\alpha r^+(\mathbf{w}_t; \mathbf{x}_t, y_t) + \beta r^-(\mathbf{w}_t; \mathbf{x}_t, y_t) - \Psi^*(\alpha, \beta)] \right\} + (L_\Psi^2 + 4B_r^2) \frac{1}{2\sqrt{T}} \\ & = \inf_{(\alpha, \beta) \in \mathcal{A}} \left\{ \alpha \frac{1}{T} \sum_{t=1}^T r^+(\mathbf{w}_t; \mathbf{x}_t, y_t) + \beta \frac{1}{T} \sum_{t=1}^T r^-(\mathbf{w}_t; \mathbf{x}_t, y_t) - \Psi^*(\alpha, \beta) \right\} + (L_\Psi^2 + 4B_r^2) \frac{1}{2\sqrt{T}} \\ & = \Psi \left( \frac{1}{T} \sum_{t=1}^T r^+(\mathbf{w}_t; \mathbf{x}_t, y_t), \frac{1}{T} \sum_{t=1}^T r^-(\mathbf{w}_t; \mathbf{x}_t, y_t) \right) + (L_\Psi^2 + 4B_r^2) \frac{1}{2\sqrt{T}}, \end{aligned}$$

where the last step follows from Fenchel conjugacy.

Further, noting that  $\mathbb{E}_{\mathbf{x}_t, y_t} [r^+(\mathbf{w}_t; \mathbf{x}_t, y_t) \mid \mathbf{x}_{1:t-1}, y_{1:t-1}] = P(\mathbf{w}_t)$ , and  $\mathbb{E}_{\mathbf{x}_t, y_t} [r^-(\mathbf{w}_t; \mathbf{x}_t, y_t) \mid \mathbf{x}_{1:t-1}, y_{1:t-1}] = N(\mathbf{w}_t)$ , we use the standard online-batch conversion bounds (Cesa-Bianchi et al., 2001) to the loss functions  $r^+$  and  $r^-$  individually to obtain w.h.p.

$$\begin{aligned} \frac{1}{T} \sum_{t=1}^T r^+(\mathbf{w}_t; \mathbf{x}_t, y_t) & \leq \sum_{t=1}^T P(\mathbf{w}_t) + \sqrt{\frac{2B_r^2}{T} \log \frac{1}{\delta}} \\ \frac{1}{T} \sum_{t=1}^T r^-(\mathbf{w}_t; \mathbf{x}_t, y_t) & \leq \sum_{t=1}^T N(\mathbf{w}_t) + \sqrt{\frac{2B_r^2}{T} \log \frac{1}{\delta}} \end{aligned}$$

By monotonicity of  $\Psi$ , we get

$$\begin{aligned} & \frac{1}{T} \sum_{t=1}^T [\alpha_t r^+(\mathbf{w}_t; \mathbf{x}_t, y_t) + \beta_t r^-(\mathbf{w}_t; \mathbf{x}_t, y_t) - \Psi^*(\alpha_t, \beta_t)] \\ & \leq \Psi \left( \frac{1}{T} \sum_{t=1}^T P(\mathbf{w}_t) + \sqrt{\frac{2B_r^2}{T} \log \frac{1}{\delta}}, \frac{1}{T} \sum_{t=1}^T N(\mathbf{w}_t) + \sqrt{\frac{2B_r^2}{T} \log \frac{1}{\delta}} \right) + (L_\Psi^2 + 4B_r^2) \frac{1}{2\sqrt{T}} \\ & \leq \Psi \left( \frac{1}{T} \sum_{t=1}^T P(\mathbf{w}_t), \frac{1}{T} \sum_{t=1}^T N(\mathbf{w}_t) \right) + \delta_\Psi \left( \sqrt{\frac{2B_r^2}{T} \log \frac{1}{\delta}} \right) + (L_\Psi^2 + 4B_r^2) \frac{1}{2\sqrt{T}} \end{aligned}$$

$$\begin{aligned}
 &\leq \Psi\left(\bar{r}^+\left(\frac{1}{T}\sum_{t=1}^T \mathbf{w}_t\right), \bar{r}^-\left(\frac{1}{T}\sum_{t=1}^T \mathbf{w}_t\right)\right) + \delta_\Psi\left(\sqrt{\frac{2B_r^2}{T}\log\frac{1}{\delta}}\right) + (L_\Psi^2 + 4B_r^2)\frac{1}{2\sqrt{T}} \\
 &= \Psi(P(\bar{\mathbf{w}}), N(\bar{\mathbf{w}})) + \delta_\Psi\left(\sqrt{\frac{2B_r^2}{T}\log\frac{1}{\delta}}\right) + (L_\Psi^2 + 4B_r^2)\frac{1}{2\sqrt{T}}, \tag{1}
 \end{aligned}$$

where the second inequality follows from stability of  $\Psi$ , and the third inequality follows from concavity of  $\bar{r}^+$  and  $\bar{r}^-$ , Jensen's inequality, and stability of  $\Psi$ .

Similarly, the update to  $\mathbf{w}$  can be written as

$$\mathbf{w}_{t+1} \leftarrow \Pi_{\mathcal{W}}(\mathbf{w}_t - \eta'_t \nabla_{\mathbf{w}} \ell_t^p(\mathbf{w}_t)),$$

where  $\Pi_{\mathcal{W}}$  is the projection operator for the domain  $\mathcal{W}$  and

$$\ell_t^p(\mathbf{w}) = \begin{cases} -\alpha_t r^+(\mathbf{w}; \mathbf{x}_t, y_t) + \Psi^*(\alpha_t, \beta_t) & \text{if } y_t > 0 \\ -\beta_t r^-(\mathbf{w}; \mathbf{x}_t, y_t) + \Psi^*(\alpha_t, \beta_t) & \text{if } y_t < 0 \end{cases}$$

Since  $r^+, r^-$  are concave and the term  $\Psi^*(\alpha_t, \beta_t)$  does not involve  $\mathbf{w}$ ,  $\ell_t^p$  is convex in  $\mathbf{w}$  for all  $t$ . Also, we can show that  $\ell_t^p(\mathbf{w})$  is an  $(L_\Psi \cdot L_r)$ -Lipschitz function. Hence, applying a standard GIGA analysis (Zinkevich, 2003) to the (ascent) update on  $\mathbf{w}_t$  in Algorithm 1 (with  $\eta'_t = \frac{1}{\sqrt{t}}$ ), we have for any  $\mathbf{w}^* \in \mathcal{W}$ ,

$$\begin{aligned}
 &\frac{1}{T} \sum_{t=1}^T [\alpha_t r^+(\mathbf{w}_t; \mathbf{x}_t, y_t) + \beta_t r^-(\mathbf{w}_t; \mathbf{x}_t, y_t) - \Psi^*(\alpha_t, \beta_t)] \\
 &\geq \frac{1}{T} \sum_{t=1}^T [\alpha_t r^+(\mathbf{w}^*; \mathbf{x}_t, y_t) + \beta_t r^-(\mathbf{w}^*; \mathbf{x}_t, y_t) - \Psi^*(\alpha_t, \beta_t)] - (L_\Psi^2 L_r^2 + R_{\mathcal{W}}^2) \frac{1}{2\sqrt{T}}.
 \end{aligned}$$

Again, observing that by linearity of expectation, we have

$$\mathbb{E}_{\mathbf{x}_t, y_t} [\alpha_t r^+(\mathbf{w}^*; \mathbf{x}_t, y_t) + \beta_t r^-(\mathbf{w}^*; \mathbf{x}_t, y_t) \mid \mathbf{x}_{1:t-1}, y_{1:t-1}] = \alpha_t P(\mathbf{w}^*) + \beta_t N(\mathbf{w}^*),$$

which gives us, through an online-batch conversion argument (Cesa-Bianchi et al., 2001) w.h.p,

$$\begin{aligned}
 &\frac{1}{T} \sum_{t=1}^T [\alpha_t r^+(\mathbf{w}_t; \mathbf{x}_t, y_t) + \beta_t r^-(\mathbf{w}_t; \mathbf{x}_t, y_t) - \Psi^*(\alpha_t, \beta_t)] \\
 &\geq \frac{1}{T} \sum_{t=1}^T [\alpha_t P(\mathbf{w}^*) + \beta_t N(\mathbf{w}^*)] - \frac{1}{T} \sum_{t=1}^T \Psi^*(\alpha_t, \beta_t) - \sqrt{\frac{2L_\Psi^2 B_r^2}{T} \log \frac{1}{\delta}} - (L_\Psi^2 L_r^2 + R_{\mathcal{W}}^2) \frac{1}{2\sqrt{T}} \\
 &\geq \frac{1}{T} \sum_{t=1}^T [\alpha_t P(\mathbf{w}^*) + \beta_t N(\mathbf{w}^*)] - \Psi^*\left(\frac{1}{T} \sum_{t=1}^T \alpha_t, \frac{1}{T} \sum_{t=1}^T \beta_t\right) - \sqrt{\frac{2L_\Psi^2 B_r^2}{T} \log \frac{1}{\delta}} - (L_\Psi^2 L_r^2 + R_{\mathcal{W}}^2) \frac{1}{2\sqrt{T}} \\
 &= \bar{\alpha} P(\mathbf{w}^*) + \bar{\beta} N(\mathbf{w}^*) - \Psi^*(\bar{\alpha}, \bar{\beta}) - \sqrt{\frac{2L_\Psi^2 B_r^2}{T} \log \frac{1}{\delta}} - (L_\Psi^2 L_r^2 + R_{\mathcal{W}}^2) \frac{1}{2\sqrt{T}} \\
 &\geq \inf_{\alpha, \beta} \left\{ \alpha P(\mathbf{w}^*) + \beta N(\mathbf{w}^*) - \Psi^*(\alpha, \beta) \right\} - \sqrt{\frac{2L_\Psi^2 B_r^2}{T} \log \frac{1}{\delta}} - (L_\Psi^2 L_r^2 + R_{\mathcal{W}}^2) \frac{1}{2\sqrt{T}} \\
 &= \Psi(P(\mathbf{w}^*), N(\mathbf{w}^*)) - \sqrt{\frac{2L_\Psi^2 B_r^2}{T} \log \frac{1}{\delta}} - (L_\Psi^2 L_r^2 + R_{\mathcal{W}}^2) \frac{1}{2\sqrt{T}}, \tag{2}
 \end{aligned}$$

where the second step follows from concavity of  $\Psi$  and Jensen's inequality, in the third step  $\bar{\alpha} = \frac{1}{T} \sum_{t=1}^T \alpha_t$  and  $\bar{\beta} = \frac{1}{T} \sum_{t=1}^T \beta_t$ , and the last step follows from Fenchel conjugacy.

Combining Eq. (1) and (2) gives us the desired result.  $\square$

### C. Proof of Theorem 5

**Theorem 5.** Suppose we have the problem setting in Theorem 4 with the  $\Psi_{G\text{-mean}}$  performance measure being optimized for. Consider a modification to Algorithm 1 wherein the reward functions are changed to  $r_t^+(\cdot) = r^+(\cdot) + \epsilon(t)$ , and  $r_t^-(\cdot) = r^-(\cdot) + \epsilon(t)$  for  $\epsilon(t) = \frac{1}{t^{1/4}}$ . Then, the average model  $\bar{\mathbf{w}} = \frac{1}{T} \sum_{t=1}^T \mathbf{w}_t$  output by the algorithm satisfies, with probability at least  $1 - \delta$ ,

$$\mathcal{P}_{\Psi_{G\text{-mean}}}(\bar{\mathbf{w}}) \geq \sup_{\mathbf{w}^* \in \mathcal{W}} \mathcal{P}_{\Psi_{G\text{-mean}}}(\mathbf{w}^*) - \tilde{\mathcal{O}}\left(\frac{1}{T^{1/4}}\right).$$

*Proof.* Suppose  $\Psi(u + \epsilon, v + \epsilon) \leq \Psi(u, v) + \delta_\Psi(\epsilon)$  as before. Let  $r_t^+(\cdot) = r^+(\cdot) + \epsilon(t)$ , and  $r_t^-(\cdot) = r^-(\cdot) + \epsilon(t)$ . Let us make all updates with respect to  $r_t^+, r_t^-$ . Let  $r(\epsilon)$  be the radius of the sufficient dual domain  $\mathcal{A}$  for a given regularization  $\epsilon$ . Also let  $\bar{\epsilon} = \frac{1}{T} \sum_{i=1}^T \epsilon(t)$ . We will assume throughout that  $\epsilon(t) = O(1)$ . Then we have:

$$\begin{aligned} & \frac{1}{T} \sum_{t=1}^T [\alpha_t r_t^+(\mathbf{w}_t; \mathbf{x}_t, y_t) + \beta_t r_t^-(\mathbf{w}_t; \mathbf{x}_t, y_t) - \Psi^*(\alpha_t, \beta_t)] \\ & \leq \inf_{(\alpha, \beta) \in \mathcal{A}} \left\{ \frac{1}{T} \sum_{t=1}^T [\alpha r_t^+(\mathbf{w}_t; \mathbf{x}_t, y_t) + \beta r_t^-(\mathbf{w}_t; \mathbf{x}_t, y_t) - \Psi^*(\alpha, \beta)] \right\} + \mathcal{O}\left(\frac{r(\bar{\epsilon})}{\sqrt{T}}\right) \\ & = \inf_{(\alpha, \beta) \in \mathcal{A}} \left\{ \alpha \frac{1}{T} \sum_{t=1}^T r^+(\mathbf{w}_t; \mathbf{x}_t, y_t) + \bar{\epsilon} + \beta \frac{1}{T} \sum_{t=1}^T r^-(\mathbf{w}_t; \mathbf{x}_t, y_t) + \bar{\epsilon} - \Psi^*(\alpha, \beta) \right\} + \mathcal{O}\left(\frac{r(\bar{\epsilon})}{\sqrt{T}}\right) \\ & = \Psi\left(\frac{1}{T} \sum_{t=1}^T r^+(\mathbf{w}_t; \mathbf{x}_t, y_t) + \bar{\epsilon}, \frac{1}{T} \sum_{t=1}^T r^-(\mathbf{w}_t; \mathbf{x}_t, y_t) + \bar{\epsilon}\right) + \mathcal{O}\left(\frac{r(\bar{\epsilon})}{\sqrt{T}}\right) \\ & = \Psi\left(\frac{1}{T} \sum_{t=1}^T r^+(\mathbf{w}_t; \mathbf{x}_t, y_t), \frac{1}{T} \sum_{t=1}^T r^-(\mathbf{w}_t; \mathbf{x}_t, y_t)\right) + \delta_\Psi(\bar{\epsilon}) + \mathcal{O}\left(\frac{r(\bar{\epsilon})}{\sqrt{T}}\right) \end{aligned} \quad (3)$$

We can now use online to batch conversion bounds (Cesa-Bianchi et al., 2001), and monotonicity of  $\Psi$  to get

$$\begin{aligned} & \frac{1}{T} \sum_{t=1}^T [\alpha_t r^+(\mathbf{w}_t; \mathbf{x}_t, y_t) + \beta_t r^-(\mathbf{w}_t; \mathbf{x}_t, y_t) - \Psi^*(\alpha_t, \beta_t)] \\ & \leq \Psi(P(\bar{\mathbf{w}}), N(\bar{\mathbf{w}})) + \delta_\Psi\left(\tilde{\mathcal{O}}\left(\frac{1}{\sqrt{T}}\right)\right) + \delta_\Psi(\bar{\epsilon}) + \mathcal{O}\left(\frac{r(\bar{\epsilon})}{\sqrt{T}}\right), \end{aligned} \quad (4)$$

For the primal updates, we get, for any  $\mathbf{w}^* \in \mathcal{W}$ ,

$$\begin{aligned} & \frac{1}{T} \sum_{t=1}^T [\alpha_t r_t^+(\mathbf{w}_t; \mathbf{x}_t, y_t) + \beta_t r_t^-(\mathbf{w}_t; \mathbf{x}_t, y_t) - \Psi^*(\alpha_t, \beta_t)] \\ & \geq \frac{1}{T} \sum_{t=1}^T [\alpha_t r_t^+(\mathbf{w}^*; \mathbf{x}_t, y_t) + \beta_t r_t^-(\mathbf{w}^*; \mathbf{x}_t, y_t) - \Psi^*(\alpha_t, \beta_t)] - \tilde{\mathcal{O}}\left(\frac{r(\bar{\epsilon})}{\sqrt{T}}\right) \\ & = \frac{1}{T} \sum_{t=1}^T [\alpha_t r^+(\mathbf{w}^*; \mathbf{x}_t, y_t) + \beta_t r^-(\mathbf{w}^*; \mathbf{x}_t, y_t) - \Psi^*(\alpha_t, \beta_t)] + \frac{1}{T} \sum_{t=1}^T \epsilon(t)(\alpha_t + \beta_t) - \tilde{\mathcal{O}}\left(\frac{r(\bar{\epsilon})}{\sqrt{T}}\right) \\ & \geq \frac{1}{T} \sum_{t=1}^T [\alpha_t r^+(\mathbf{w}^*; \mathbf{x}_t, y_t) + \beta_t r^-(\mathbf{w}^*; \mathbf{x}_t, y_t) - \Psi^*(\alpha_t, \beta_t)] - \tilde{\mathcal{O}}\left(\frac{r(\bar{\epsilon})}{\sqrt{T}}\right), \end{aligned}$$

since  $\epsilon(t), \alpha_t, \beta_t \geq 0$ . Again using an online-batch conversion argument (Cesa-Bianchi et al., 2001) we get w.h.p,

$$\frac{1}{T} \sum_{t=1}^T [\alpha_t r^+(\mathbf{w}_t; \mathbf{x}_t, y_t) + \beta_t r^-(\mathbf{w}_t; \mathbf{x}_t, y_t) - \Psi^*(\alpha_t, \beta_t)] \geq \Psi(P(\mathbf{w}^*), N(\mathbf{w}^*)) - \tilde{\mathcal{O}}\left(\frac{r(\bar{\epsilon})}{\sqrt{T}}\right). \quad (5)$$

Combining Eq. (4) and (5) gives us

$$\Psi(P(\bar{\mathbf{w}}), N(\bar{\mathbf{w}})) \geq \Psi(P(\mathbf{w}^*), N(\mathbf{w}^*)) - \tilde{O}\left(\frac{r(\bar{\epsilon})}{\sqrt{T}}\right) - \delta_\Psi\left(\tilde{O}\left(\frac{1}{\sqrt{T}}\right)\right) - \delta_\Psi(\bar{\epsilon})$$

For G-mean,  $\delta_\Psi(x) = \sqrt{x}$ , and by an application of Lemma 3, we have  $r(\epsilon) = O(1/\sqrt{\epsilon})$ . Thus we have

$$\Psi(P(\bar{\mathbf{w}}), N(\bar{\mathbf{w}})) \geq \Psi(P(\mathbf{w}^*), N(\mathbf{w}^*)) - \tilde{O}\left(\frac{1}{\sqrt{T\bar{\epsilon}}}\right) - \tilde{O}\left(\frac{1}{\sqrt[4]{T}}\right) - \sqrt{\bar{\epsilon}}$$

For  $\bar{\epsilon} = \mathcal{O}\left(\frac{1}{\sqrt[4]{T}}\right)$ , we get

$$\Psi(P(\bar{\mathbf{w}}), N(\bar{\mathbf{w}})) \geq \Psi(P(\mathbf{w}^*), N(\mathbf{w}^*)) - \tilde{O}\left(\frac{1}{\sqrt[4]{T}}\right)$$

This can be achieved with  $\epsilon(t) = \frac{1}{\sqrt[4]{t}}$ . □

## D. Proof of Theorem 8

**Theorem 8.** *Let Algorithm 2 be executed with a performance measure  $\mathcal{P}_{(a,b)}$  and reward functions that offer values in the range  $[0, m)$ . Let  $\mathcal{P}^* := \sup_{\mathbf{w} \in \mathcal{W}} \mathcal{P}_{(a,b)}(\mathbf{w})$ . Also let  $\Delta_t = \mathcal{P}^* - \mathcal{P}_{(a,b)}(\mathbf{w}_t)$  be the excess error for the model  $\mathbf{w}_t$  generated at time  $t$ . Then there exists a value  $\eta(m) < 1$  such that for  $\Delta_t \leq \Delta_0 \cdot \eta(m)^t$ .*

*Proof.* In order to be generic in its treatment, the proof will require the following regularity conditions on the performance measure

1.  $b_0 \neq 0$
2.  $\alpha - \mathcal{P}(\mathbf{w}) \cdot \gamma \geq 0$  for all  $\mathbf{w} \in \mathcal{W}$
3.  $\beta - \mathcal{P}(\mathbf{w}) \cdot \delta \geq 0$  for all  $\mathbf{w} \in \mathcal{W}$
4.  $-1 < f \leq \gamma \cdot P(\mathbf{w}) + \delta \cdot N(\mathbf{w}) \leq g$  for all  $\mathbf{w} \in \mathcal{W}$

Define  $e_t := V(\mathbf{w}_{t+1}, v_t) - v_t$ . Then we can state the following lemmata which together yield the convergence bound proof.

**Lemma 10.**  $\frac{e_t}{1+f} \geq \mathcal{P}^* - v_t$

*Proof.* Assume that for some  $\mathbf{w}^*$ ,  $\mathcal{P}(\mathbf{w}^*) = v_t + e_t + e'$  where  $e' > 0$ . Then we have

$$\begin{aligned} V(\mathbf{w}^*, v_t) &= \left(\frac{e_t}{1+f} + e'\right) (1 + \gamma \cdot P(\mathbf{w}^*) + \delta \cdot N(\mathbf{w}^*)) - e_t \\ &\geq \left(\frac{e_t}{1+f} + e'\right) (1+f) - e_t \\ &= e'(1+f) > 0, \end{aligned}$$

which contradicts the fact that no classifier can achieve a valuation greater than  $v_t + e_t$  at level  $v_t$ , thus proving the desired result. □

**Lemma 11.** *For any  $\mathbf{w}$  that achieves  $V(\mathbf{w}, v) = v + e$  such that  $e \geq 0$ , we have*

$$\mathcal{P}(\mathbf{w}) \geq v + \frac{e}{g+1}$$

*Proof.* Let  $v' = v + \frac{e}{g+1}$ . We will show that  $V(\mathbf{w}, v') \geq v'$  which will establish the result by pseudo-linearity. We have

$$\begin{aligned} V(\mathbf{w}, v') - v' &= c + (\alpha - v'\gamma) \cdot P(\mathbf{w}) + (\beta - v'\delta) \cdot N(\mathbf{w}) - v' \\ &= c + (\alpha - v\gamma) \cdot P(\mathbf{w}) + (\beta - v\delta) \cdot N(\mathbf{w}) - v' - \frac{e}{g+1}(\gamma \cdot P(\mathbf{w}) + \delta \cdot N(\mathbf{w})) \\ &= v + e - v' - \frac{e}{g+1}(\gamma \cdot P(\mathbf{w}) + \delta \cdot N(\mathbf{w})) \\ &\geq v + e - v' - \frac{ge}{g+1} = 0, \end{aligned}$$

where we have used the bounds on  $\gamma \cdot P(\mathbf{w}) + \delta \cdot N(\mathbf{w})$  and the fact that  $1 + g > 0$ .  $\square$

Given the above results we can establish the convergence bound. More specifically, we can show the following: let  $\Delta_t = \mathcal{P}^* - \mathcal{P}(\mathbf{w}_t)$ . Then we have

$$\Delta_{t+1} \leq \frac{g-f}{g+1} \cdot \Delta_t$$

To see this, consider the following

$$\begin{aligned} \Delta_{t+1} &= \mathcal{P}^* - \mathcal{P}(\mathbf{w}_{t+1}) \leq \mathcal{P}^* - \left( v_t + \frac{e_t}{g+1} \right) \leq \mathcal{P}^* - \left( v_t + \frac{(1+f)(\mathcal{P}^* - v_t)}{g+1} \right) \\ &= \mathcal{P}^* - \left( \mathcal{P}(\mathbf{w}_t) + \frac{(1+f)(\mathcal{P}^* - \mathcal{P}(\mathbf{w}_t))}{g+1} \right) = \Delta_t - \frac{1+f}{g+1} \cdot \Delta_t = \frac{g-f}{g+1} \cdot \Delta_t, \end{aligned}$$

which proves the result. Notice that Table 2 gives the rates of convergence for the different performance measures by calculating bounds on the value of  $\frac{g-f}{g+1}$  for those performance measures.  $\square$

## E. An analysis of the AMP Algorithm under Inexact Maximizations

For this and the next section, we will, for the sake of simplicity, we will focus only on the F-measure for  $\beta = 1$  and  $p = 1/2$  so that  $\theta = 1$ . For this setting, the F-measure looks like the following:  $F(P, N) = \frac{2P}{2+P-N}$ , and the valuation function looks like  $V(\mathbf{w}, v) = (1 - v/2) \cdot P(\mathbf{w}) + v/2 \cdot N(\mathbf{w})$ . We shall denote the performance measure as  $F(\mathbf{w})$ , and its optimal value as  $F^*$ . We will assume that the reward functions give bounded rewards in the range  $[0, m)$ .

So far we assumed that Step 4 in the Algorithm **AMP** gave us  $\mathbf{w}_{t+1}$  such that

$$V(\mathbf{w}_{t+1}, v_t) = \max_{\mathbf{w} \in \mathcal{W}} V(\mathbf{w}, v_t)$$

Now we will only assume that  $\mathbf{w}_{t+1}$  satisfies

$$V(\mathbf{w}_{t+1}, v_t) = \max_{\mathbf{w} \in \mathcal{W}} V(\mathbf{w}, v_t) - \epsilon_t$$

We also assume that the level  $v_t$  is only approximated in Step 5 of **AMP**, i.e. using Lemma 7 we have

$$v_t = F(\mathbf{w}_t) + \delta_t$$

where  $\delta_t$  is a signed real number.

Given these approximations, we can prove the following results

**Lemma 12.** *The following hold for the setting described above*

1. If  $\delta_t \leq 0$  then  $e_t \geq 0$
2. If  $\delta_t > 0$  then  $e_t \geq -\delta_t \left(1 + \frac{m}{2}\right)$
3. If  $F^* < v_t$  (which can happen only if  $\delta_t > 0$ ), then  $e_t < 0$
4. If  $e_t < 0$  then  $F^* < v_t$

5. We have

- (a) If  $e_t \geq 0$ , then  $e_t \geq \left(\frac{2-m}{2}\right) (F^* - v_t)$ .  
 (b) If  $e_t < 0$ , then  $e_t \geq \left(\frac{2+m}{2}\right) (F^* - v_t)$ .

6. If  $V(\mathbf{w}, v) = v + e$ , then

- (a) If  $e \geq 0$  then  $F(\mathbf{w}) \geq v + \frac{2e}{2+m}$   
 (b) If  $e < 0$  then  $F(\mathbf{w}) \geq v + \frac{2e}{2-m}$

*Proof.* We give the proof in parts

1. If  $\delta_t \leq 0$  then this means that there exists a  $\mathbf{w}$  such that  $F(\mathbf{w}) \geq v_t$ . The result then follows from pseudo linearity.
2.  $v_t = F(\mathbf{w}_t) + \delta_t$  gives us, by pseudo linearity of F-measure,

$$(1 - v_t/2) \cdot P(\mathbf{w}_t) + v_t/2 \cdot N(\mathbf{w}_t) = v_t - \delta_t \left(1 + \frac{P(\mathbf{w}_t) - N(\mathbf{w}_t)}{2}\right) \geq v_t - \delta_t \left(1 + \frac{m}{2}\right).$$

The bound on  $e_t$  now follows from its definition.

3. Suppose  $e_t \geq 0$  then by pseudo linearity of F-measure, we have, for some  $\mathbf{w}$ ,  $V(\mathbf{w}, v_t) \geq v_t$  which means  $F(\mathbf{w}) \geq v_t$  which contradicts the assumption.
4. Suppose there exists  $\mathbf{w}^*$  with  $F(\mathbf{w}^*) = v_t + e'$  with  $e' \geq 0$  then we have

$$(1 - v_t/2) \cdot P(\mathbf{w}^*) + v_t/2 \cdot N(\mathbf{w}^*) = v_t + e' \left(1 + \frac{P(\mathbf{w}^*) - N(\mathbf{w}^*)}{2}\right) \geq 0,$$

which contradicts the fact that  $e_t < 0$ .

5. Part (a) is simply Lemma 10. For part (b), we will prove that  $F^* \leq v_t + \frac{2e_t}{2+m}$ . Since  $\frac{2}{2+m} > 0$ , the result will follow. Assume the contrapositive that some  $\mathbf{w}^*$  achieves  $F(\mathbf{w}^*) = v_t + \frac{2e_t}{2+m} + e'$  for some  $e' > 0$ . Using the pseudo linearity of F-measure (and using the shorthand  $v' = v_t + \frac{2e_t}{2+m} + e'$ ), this can be expressed as

$$(1 - v'/2) \cdot P(\mathbf{w}^*) + v'/2 \cdot N(\mathbf{w}^*) = v'$$

where for some  $e' > 0$ . Then we have

$$\begin{aligned} (1 - v_t/2) \cdot P(\mathbf{w}^*) + v_t/2 \cdot N(\mathbf{w}^*) - v_t - e_t &= v' - v_t - e_t + \frac{1}{2} \left( \frac{2e_t}{2+m} + e' \right) (P(\mathbf{w}^*) - N(\mathbf{w}^*)) \\ &= \frac{2e_t}{2+m} + e' - e_t + \frac{1}{2} \left( \frac{2e_t}{2+m} + e' \right) (P(\mathbf{w}^*) - N(\mathbf{w}^*)) \\ &\geq \frac{2e_t}{2+m} + e' - e_t + \frac{m}{2} \left( \frac{2e_t}{2+m} + e' \right) \\ &= e' \left(1 + \frac{m}{2}\right) + e_t \left( \frac{2}{2+m} - 1 + \frac{m}{2+m} \right) \\ &= e' \left(1 + \frac{m}{2}\right) > 0, \end{aligned}$$

where we have assumed that  $e'$  is chosen small enough so that  $\frac{2e_t}{2+m} + e' < 0$  still and used the fact that  $P(\mathbf{w}^*) - N(\mathbf{w}^*) \leq m$ .

6. Part (a) is simply Lemma 11. To prove part (b), we let  $v' = v + \frac{2e}{2-m}$ , then we have

$$(1 - \frac{v'}{2}) \cdot P(\mathbf{w}) + \frac{v'}{2} \cdot N(\mathbf{w}) - v' = (1 - \frac{v}{2}) \cdot P(\mathbf{w}) + \frac{v}{2} \cdot N(\mathbf{w}) - v' + \frac{e}{2-m} (N(\mathbf{w}) - P(\mathbf{w}))$$

$$\begin{aligned}
 &\geq \left(1 - \frac{v}{2}\right) \cdot P(\mathbf{w}) + \frac{v}{2} \cdot N(\mathbf{w}) - v' + \frac{me}{2-m} \\
 &= v + e - \left(v + \frac{2e}{2-m}\right) + \frac{me}{2-m} \\
 &= e \left(1 - \frac{2}{2-m} + \frac{m}{2-m}\right) \\
 &= 0,
 \end{aligned}$$

where the second inequality follows since  $N(\mathbf{w}) - P(\mathbf{w}) \leq m$  and  $e < 0$  by using the bounds on the reward functions. This proves the result. □

### E.1. Convergence analysis

We have the following cases with us

1. Case 1 ( $\delta_t \leq 0$ ): In this case we are setting  $v_t$  to a value less than the F-measure of the current classifier. This should hurt performance - we know that  $v_t = F(\mathbf{w}_t) + \delta_t$  which gives us, on applying part (a) of the previous lemma using  $F^* - v_t = \Delta_t - \delta_t$ , the following

$$e_t \geq \frac{2-m}{2}(\Delta_t - \delta_t).$$

Note that we are guaranteed that  $e_t \geq 0$  in this case. Now since the maximization in step 4 is also carried out approximately, we have  $V(\mathbf{w}_{t+1}, v_t) = v_t + e_t - \epsilon_t$ . Now we have two sub cases

- (a) Case 1.1 ( $\epsilon_t \leq e_t$ ): In this case we can apply part 6(a) of the previous lemma to get the following result

$$\Delta_{t+1} \leq \frac{2m}{2+m}\Delta_t - \frac{2m}{2+m}\delta_t + \frac{2\epsilon_t}{2m}$$

- (b) Case 1.2 ( $\epsilon_t > e_t$ ): In this case we are actually making negative progress in the maximization step (since we have  $V(\mathbf{w}_{t+1}, v_t) \leq v_t$ ) and we can only invoke Lemma 5.6(b) to get

$$\Delta_{t+1} \leq \frac{2\epsilon_t}{2-m}$$

Note that the above result should not be interpreted as a one shot step to a very good classifier. The above result holds along with the condition that  $\epsilon_t > e_t$ . Thus the performance of the classifier is lower bounded by  $e_t$  which depends on how far the current classifier is from the best.

2. Case 2 ( $\delta_t > 0$ ): In this case we are setting  $v_t$  to the value higher than the F-measure of the current classifier. This can mislead the classifier and results in the following two sub-cases

- (a) Case 2.1 ( $F^* \geq v_t$ ): In this case we are still setting  $v_t$  to a legitimate value, i.e. one that is a valid F-measure for some classifier in the hypothesis class. This can only benefit the next optimization stage (in fact if we set  $v_t = F^*$ , then we would obtain the best classifier in this very iteration!). In this case  $e_t \geq 0$  and we can use the analyses of Cases 1.1 and 1.2.

- (b) Case 2.2 ( $F^* < v_t$ ): In this case we are setting  $v_t$  to an illegal value, one that is an unachievable value of F-measure. Consequently, using part 3 of the previous lemma,  $e_t < 0$  and using part(b) of the previous lemma we get

$$e_t \geq \frac{2+m}{2}(\Delta_t - \delta_t),$$

which, upon applying part 6(b) of the previous lemma (since  $e_t - \epsilon_t \leq e_t < 0$ ) will give us

$$\begin{aligned}
 \Delta_{t+1} &\leq \frac{2m}{2-m}(\delta_t - \Delta_t) + \frac{2\epsilon_t}{2-m} \\
 &\leq \frac{2m}{2-m}\delta_t + \frac{2\epsilon_t}{2-m}
 \end{aligned}$$



We can combine the cases together as follows

$$\begin{aligned}
 \Delta_{t+1} &\leq \max \left\{ \mathbf{1}\{\delta \leq 0\} \cdot \left\{ \frac{2m}{2+m} \Delta_t - \frac{2m}{2+m} \delta_t + \frac{2\epsilon_t}{2+m} \right\}, \mathbf{1}\{\epsilon_t > e_t\} \cdot \frac{2\epsilon_t}{2-m}, \mathbf{1}\{\delta > 0\} \cdot \left\{ \frac{2m}{2-m} \delta_t + \frac{2\epsilon_t}{2-m} \right\} \right\} \\
 &\leq \max \left\{ \frac{2m}{2+m} \Delta_t + \frac{2m}{2+m} |\delta_t| + \frac{2\epsilon_t}{2+m}, \mathbf{1}\{\epsilon_t > e_t\} \cdot \frac{2\epsilon_t}{2-m}, \frac{2m}{2-m} |\delta_t| + \frac{2\epsilon_t}{2-m} \right\} \\
 &\leq \frac{2m}{2+m} \Delta_t + \frac{2m}{2-m} |\delta_t| + \frac{2\epsilon_t}{2-m}
 \end{aligned}$$

If we let  $\eta = \frac{2m}{2+m}$ ,  $\eta' = \frac{2m}{2-m}$ , and  $\xi_t = |\delta_t| + \epsilon_t/m$ , then this gives us

$$\Delta_{t+1} \leq \eta \Delta_t + \eta' \xi_t,$$

which gives us

$$\Delta_T \leq \eta^T \Delta_0 + \frac{\eta'}{\eta} \cdot \sum_{i=0}^{T-1} \eta^{T-i} \xi_i$$

This concludes our analysis.

## F. Proof of Theorem 9

**Theorem 9.** *Let Algorithm 3 be executed with a performance measure  $\mathcal{P}_{(\mathbf{a}, \mathbf{b})}$  and reward functions with range  $[0, m)$ . Let  $\eta = \eta(m)$  be the rate of convergence guaranteed for  $\mathcal{P}_{(\mathbf{a}, \mathbf{b})}$  by the AMP algorithm. Set the epoch lengths to  $s_e, s'_e = \tilde{\mathcal{O}}\left(\frac{1}{\eta^{2e}}\right)$ . Then after  $e = \log_{\frac{1}{\eta}}\left(\frac{1}{\epsilon} \log^2 \frac{1}{\epsilon}\right)$  epochs, we can ensure with probability at least  $1 - \delta$  that  $\mathcal{P}^* - \mathcal{P}_{(\mathbf{a}, \mathbf{b})}(\mathbf{w}_e) \leq \epsilon$ . Moreover the number of samples consumed till this point is at most  $\tilde{\mathcal{O}}\left(\frac{1}{\epsilon^2}\right)$ .*

*Proof.* Using Hoeffding's inequality, standard regret and online-to-batch guarantees (Cesa-Bianchi et al., 2001; Zinkevich, 2003), we can ensure that, if the stream lengths for the Model optimization stage and Challenge level estimation stage procedures are  $s_e$  and  $s'_e$  respectively, then for some fixed  $c > 0$  that is independent of the stream length, we have

$$|\delta_t| \leq c \cdot \sqrt{\frac{\log \frac{1}{\delta}}{s'_e}}, |\epsilon_t| \leq c \sqrt{\frac{\log \frac{1}{\delta}}{s_e}}$$

Let  $T = \log_{\frac{1}{\eta}}\left(\frac{1}{\epsilon} \log^2 \frac{1}{\epsilon}\right)$  and  $s_e = \left(\frac{2c}{m}\right)^2 \left(\frac{1}{\eta}\right)^{2e} \log \frac{T}{\delta}$  and  $s'_e = 4c^2 \left(\frac{1}{\eta}\right)^{2e} \log \frac{T}{\delta}$  - this gives us, for each  $e$ , with probability at least  $1 - \delta/T$ ,

$$\xi_e \leq \eta^e$$

Thus, using a union bound, with probability at least  $1 - \delta$ , we have, by the discussion in the previous section,

$$\begin{aligned}
 \Delta_T &\leq \eta^T \Delta_0 + \frac{\eta'}{\eta} \sum_{i=0}^{T-1} \eta^{T-i} \xi_i \leq \eta^T \Delta_0 + \frac{\eta'}{\eta} T \eta^T \\
 &\leq \epsilon \Delta_0 \log^{-2} \frac{1}{\epsilon} + \frac{\eta'}{\eta} \log_{\frac{1}{\eta}} \left( \frac{1}{\epsilon} \log^2 \frac{1}{\epsilon} \right) \epsilon \log^{-2} \frac{1}{\epsilon} \\
 &\leq \epsilon \left( \Delta_0 + \frac{\eta'}{\eta \log \frac{1}{\eta}} \right),
 \end{aligned}$$

where the last step follows from the fact that for any  $\epsilon < 1/e^2$ , we have

$$\log \left( \frac{1}{\epsilon} \log^2 \frac{1}{\epsilon} \right) \leq \log^2 \frac{1}{\epsilon}$$

Let  $d = \left( \Delta_0 + \frac{\eta'}{\eta \log \frac{1}{\eta}} \right)$  so that we can later set  $\epsilon' = \epsilon/d$ , and  $s = 4c^2 \left( 1 + \frac{1}{m^2} \right)$  so that  $s_e + s'_e = s \left( \frac{1}{\eta} \right)^{2e} \log \frac{T}{\delta}$ . The total number of samples required can then be calculated as

$$\sum_{e=1}^T s_e + s'_e = s \log \frac{T}{\delta} \sum_{e=1}^T \left( \frac{1}{\eta} \right)^{2e} = s \log \frac{T}{\delta} \frac{1}{1 - \eta^2} \left( \frac{1}{\eta^2} \right)^T \leq s \log \frac{T}{\delta} \frac{1}{1 - \eta^2} \frac{1}{\epsilon^2} \log^4 \frac{1}{\epsilon}$$

This gives the number of samples required as

$$\mathcal{O} \left( \frac{1}{\epsilon^2} \log^4 \frac{1}{\epsilon} \left( \log \log \frac{1}{\epsilon} + \log \frac{1}{\delta} \right) \right),$$

to get an  $\epsilon$ -accurate solution with confidence  $1 - \delta$ . □
